# Supplementary material for: Cardiac mechanics and dysfunction with anthracyclines in the community: results from the PREDICT study
Source: PubMed Central journal article supplement — Open Heart. 2017 Jan 16;4(1):e000524. doi: 10.1136/openhrt-2016-000524 (PMC5255565; doi:10.1136/openhrt-2016-000524), 2017-01-16
Supplement: openhrt-2016-000524supp.pdf [file openhrt-2016-000524supp.pdf]

**Supplementary Materials:**

**Supplementary Table 1.** Characteristics of the PREDICT Trial Study Participants at Baseline By Inclusion in the Echocardiographic Supplement

| Characteristics                         | Included (n=165) | Excluded (n=433) | P*    |
|-----------------------------------------|------------------|------------------|-------|
| Age, years (SD)                         | 53 (13)          | 53 (13)          | 0.57  |
| Female Sex, n (%)                       | 127 (77)         | 355 (82)         | 0.16  |
| White Race, n (%)                       | 149 (90)         | 333 (77)         | <0.01 |
| Cancer type, n (%)                      |                  |                  |       |
| Breast Cancer                           | 101 (61)         | 296 (68)         | 0.10  |
| Lymphoma                                | 48 (29)          | 99 (23)          | 0.14  |
| Trastuzumab therapy, n (%)              | 13 (8)           | 53 (12)          | 0.15  |
| Hypertension, n (%)                     | 52 (32)          | 139 (32)         | 0.84  |
| Hyperlipidemia, n (%)                   | 33 (20)          | 54 (13)          | 0.03  |
| Body mass index, kg/m <sup>2</sup> (SD) | 28.4 (6.2)       | 29.9 (7.4)       | 0.03  |

\*P values were determined using Fisher's exact tests for categorical variables and Wilcoxon rank sum tests for continuous variables; SD standard deviation

**Supplementary Table 2.** Characteristics of the Echocardiography Substudy

## Participants at Baseline By Inclusion in the 'Prognostic' Analyses

| Baseline Characteristics                              | Included (n=103) | Excluded (n=62) | P*   |
|-------------------------------------------------------|------------------|-----------------|------|
| <i>Demographic and Clinical Characteristics</i>       |                  |                 |      |
| Age, years (SD)                                       | 54 (12)          | 52 (14)         | 0.35 |
| Female Sex, n (%)                                     | 82 (80)          | 45 (73)         | 0.34 |
| White Race, n (%)                                     | 94 (91)          | 55 (89)         | 0.60 |
| Breast Cancer, n (%)                                  | 67 (65)          | 34 (55)         | 0.25 |
| Trastuzumab therapy, n (%)                            | 10 (10)          | 3 (5)           | 0.37 |
| Hypertension, n (%)                                   | 32 (31)          | 20 (32)         | 0.87 |
| Hyperlipidemia, n (%)                                 | 24 (23)          | 9 (15)          | 0.23 |
| Body mass index, kg/m <sup>2</sup> (SD)               | 29.0 (6.5)       | 27.4 (5.7)      | 0.14 |
| <i>Echocardiography Measures</i>                      |                  |                 |      |
| Ejection Fraction, % (SD)                             | 50.4 (5.5)       | 49.3 (6.3)      | 0.26 |
| Longitudinal strain, % (SD)                           | -15.0 (2.9)      | -14.7 (2.6)     | 0.51 |
| Circumferential strain, % (SD)                        | -24.1 (4.7)      | -23.0 (6.2)     | 0.15 |
| Radial strain, % (SD)                                 | 46.3 (23.1)      | 45.1 (22.6)     | 0.88 |
| Longitudinal strain rate, 0.1 s <sup>-1</sup> (SD)    | -0.9 (0.2)       | -0.9 (0.2)      | 0.67 |
| Circumferential strain rate, 0.1 s <sup>-1</sup> (SD) | -1.6 (0.5)       | -1.5 (0.4)      | 0.37 |
| Radial strain rate, 0.1 s <sup>-1</sup> (SD)          | 2.4 (1.1)        | 2.3 (0.8)       | 0.91 |
| Ees <sub>sb</sub> , 0.1 mmHg/ml (SD)                  | 2.1 (0.6)        | 2.0 (0.7)       | 0.41 |
| V <sub>100</sub> , ml (SD)                            | 53.0 (15.2)      | 55.4 (16.0)     | 0.46 |
| Ea, 0.1 mmHg/ml (SD)                                  | 2.0 (0.5)        | 2.0 (0.5)       | 0.88 |

Ea/Ees<sub>sb</sub>, 0.1 unit (SD)

1.0 (0.2)

1.1 (0.3)

0.28

---

\*P values were determined using Fisher's exact tests for categorical variables and Wilcoxon rank sum tests for continuous variables; SD standard deviation
